# Supplementary material for: Triply phenoxo bridged Eu(iii) and Sm(iii) complexes with 2,6-diformyl-4-methylphenol-di(benzoylhydrazone): structure, spectra and biological study in human cell lines
Source: Royal Society of Chemistry journal article supplement (doi:10.1039/c4nj01464b), 2014-11-19

## **Supplementary Information**

**Triply phenoxo bridged Eu(III) and Sm(III) complexes with 2,6-diformyl-4-methylphenol di(benzoylhydrazone) : Emission, EPR, antimicrobial and cytotoxicity study on different human cell lines**

**Kuheli Das, Soumendra Nandi, Sudipa Mondal, Tulin Askun, Zerrin Cantürk, Pinar Celikboyun, Chiara Massera, Eugenio Garribba, Amitabha Datta,\* Chittaranjan Sinha,\* Takashiro Akitsu**

**Synthesis of 2,6-diformyl-4-methylphenol-di(benzoylhydrazone), H<sub>3</sub>L**

The ligand was synthesized according to literature procedure <sup>[19]</sup> (**Scheme 1**). 4-Methylphenol in glacial acetic acid was reacted with *p*-formaldehyde and hexamethylene tetraamine to synthesize 2,6-diformyl-4-methylphenol. It was then condensed with benzhydrazide in methanol to isolate 2,6-diformyl-4-methylphenol-di(benzoylhydrazone) (H<sub>3</sub>L) in good yield (80%).

<sup>1</sup>H NMR, 300 MHz, *d*<sub>6</sub>-DMSO: 12.31 (1-OH s); 7.55 (4,6-H s); 8.7 (8,8'-H s); 12.13 (10,10'-NH s); 7.93 (13,13',17,17'-H d, J = 7.2); 7.59 (15,15'-H e); 7.51 (14,14',16,16'-H e); 2.31(5-CH<sub>3</sub> s) (s, singlet; d, doublet; e, multiplet).

Step 1:

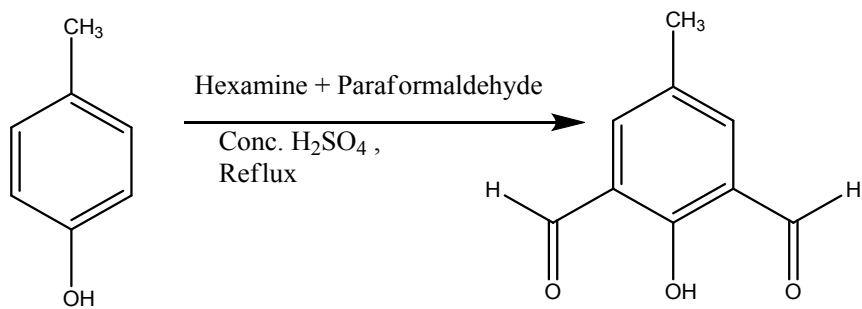

Step 2:

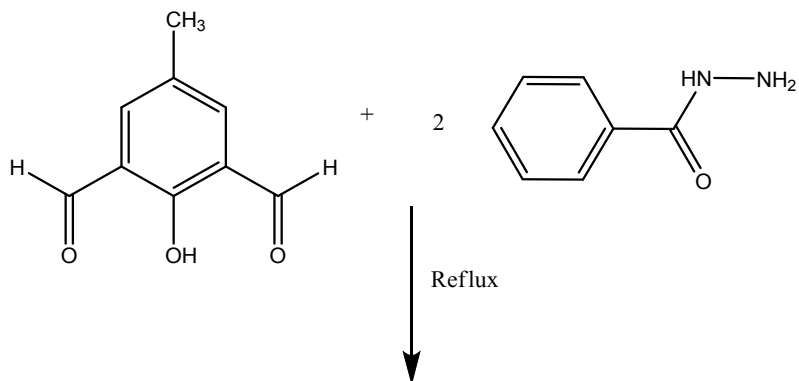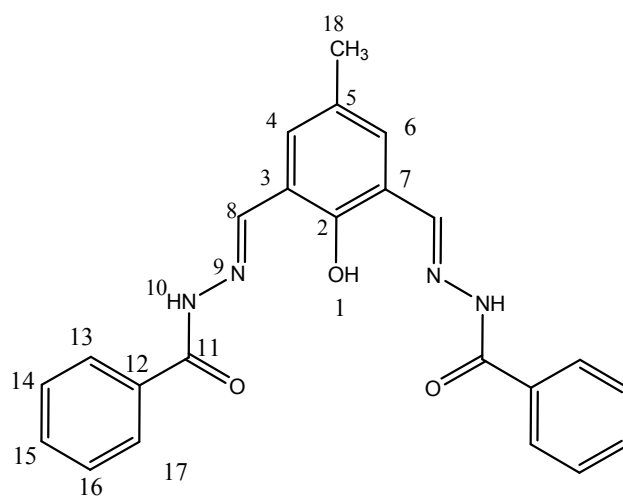

Figure S1

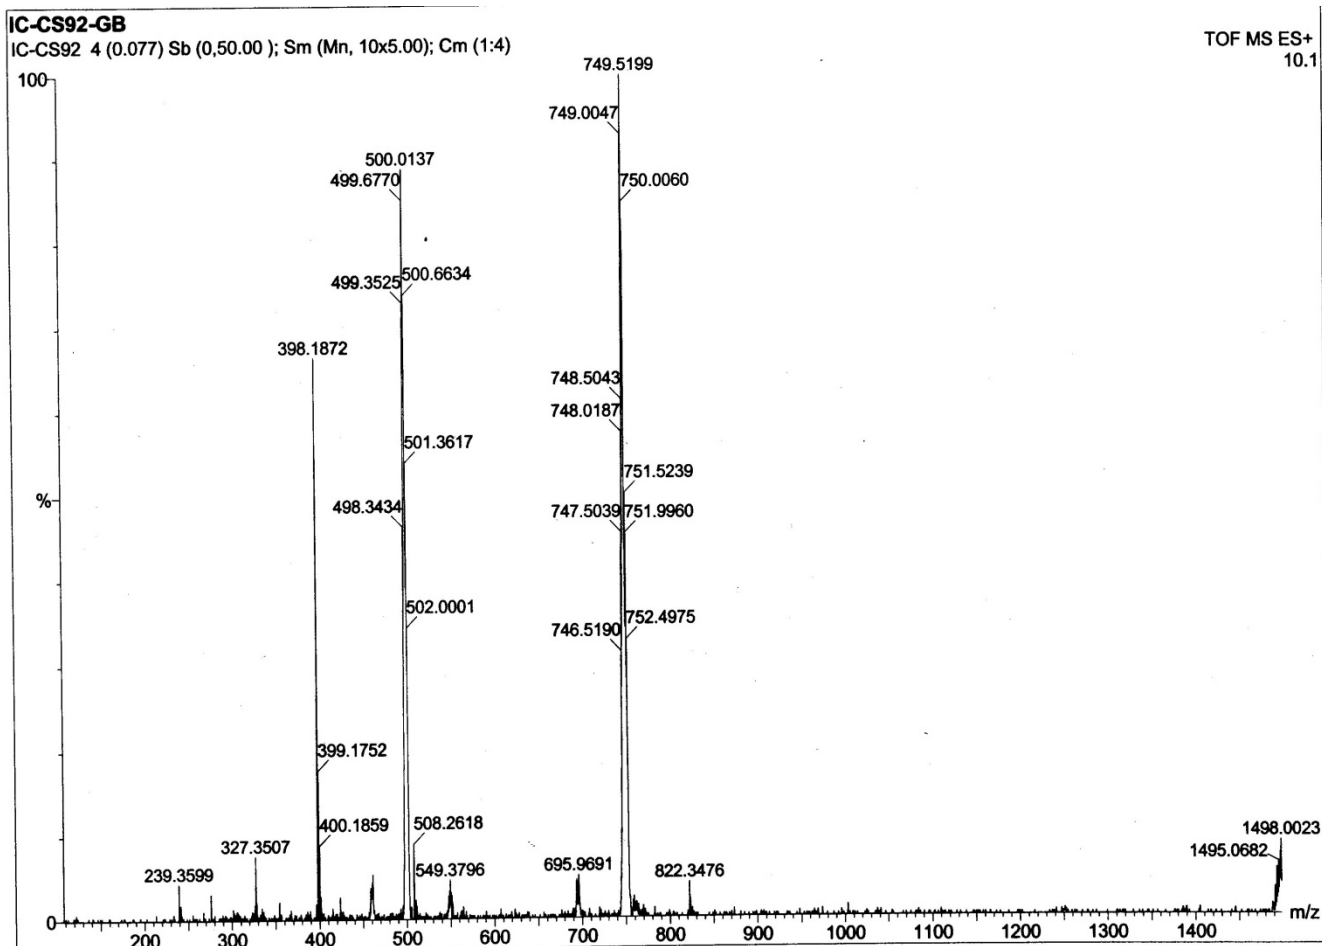

Figure S2

CRS-KD-22  
CRS-KD-22 16 (0.327) Cm (15:20)

1: TOF MS ES+  
7.89e3

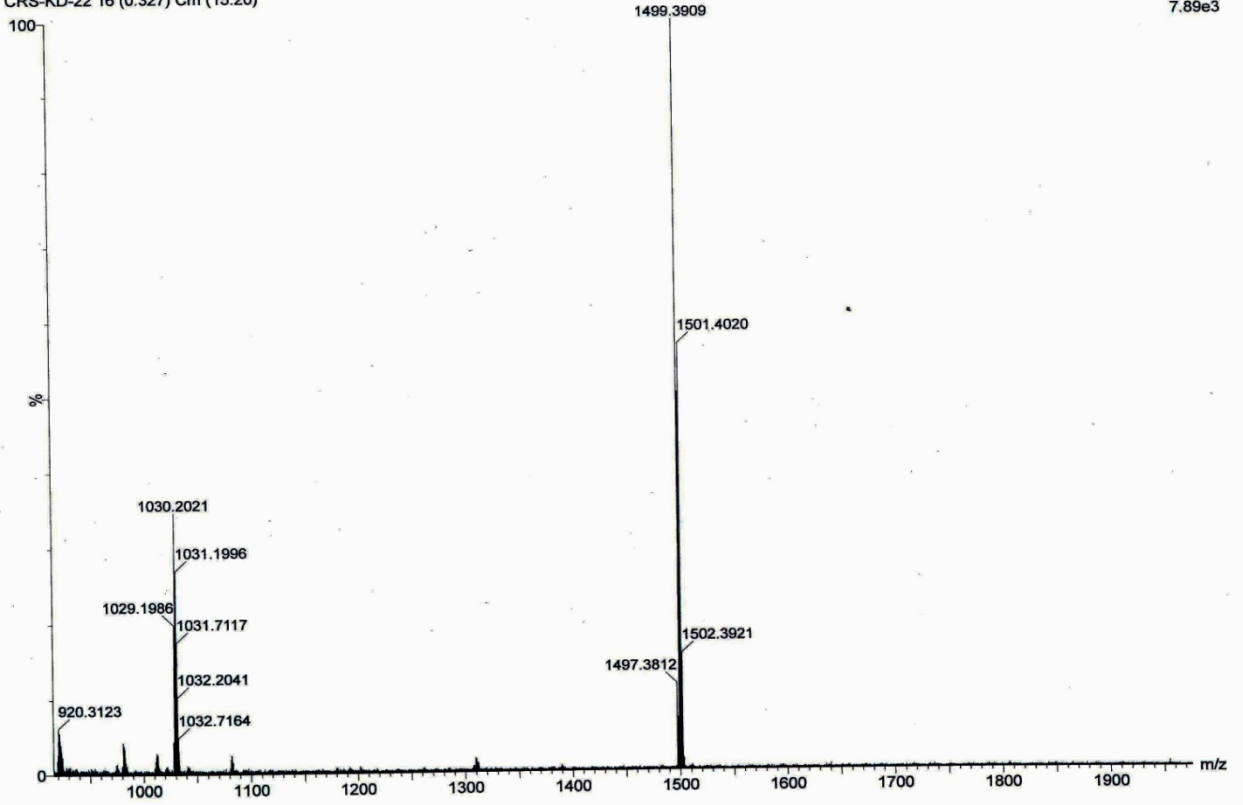

Supplement: c4nj01464b1.pdf [file c4nj01464b1.pdf]
